# Supplementary material for: Synthesis of a 1,2-cis-indoxyl galactoside as a chromogenic glycosidase substrate
Source: Royal Society of Chemistry journal article supplement (doi:10.1039/c9ra05797h), 2019-01-01

## Electronic Supplementary Information

# Synthesis of a 1,2-*cis*-indoxyl galactoside as a chromogenic glycosidase substrate

Sakuto Nagata<sup>a</sup>, Hirotaka Tomida<sup>a</sup>, Haruka Hirose-Iwai<sup>a,b</sup>, Hide-Nori Tanaka<sup>b,c</sup>,  
Hiromune Ando<sup>b,c</sup>, Akihiro Imamura<sup>a,b,\*</sup>, Hideharu Ishida<sup>a,b,c,\*</sup>

<sup>a</sup>Department of Applied Bioorganic Chemistry, Gifu University, 1-1 Yanagido, Gifu 501-1193, Japan

<sup>b</sup>The United Graduate School of Agricultural Science, Gifu University, 1-1 Yanagido, Gifu 501-1193, Japan

<sup>c</sup>Center for Highly Advanced Integration of Nano and Life Sciences (G-CHAIN), Gifu University, 1-1 Yanagido,  
Gifu 501-1193, Japan

### Table of Contents

| Compound                                                                                                                                           | Spectra |
|----------------------------------------------------------------------------------------------------------------------------------------------------|---------|
| 1-Acetyl-5-bromo-4-chloroindol-3-ol ( <b>7</b> )                                                                                                   | S-2     |
| Phenyl 2,3-di- <i>O</i> -acetyl-4,6- <i>O</i> -di- <i>tert</i> -butylsilylene-1-thio-β-D-galactopyranoside ( <b>11</b> )                           | S-3     |
| <i>N</i> -Acetyl-5-bromo-4-chloroindoxyl 2,3,4,6-tetra- <i>O</i> -benzoyl-β-D-galactopyranoside ( <b>16β</b> )                                     | S-4     |
| Phenyl 2,3-di- <i>O</i> -benzoyl-4,6- <i>O</i> -di- <i>tert</i> -butylsilylene-1-thio-β-D-galactopyranoside ( <b>17</b> )                          | S-5     |
| 2,3-Di- <i>O</i> -benzoyl-4,6- <i>O</i> -di- <i>tert</i> -butylsilylene-α-D-galactopyranosyl trichloroacetimidate ( <b>18α</b> )                   | S-6     |
| <i>N</i> -Acetyl-5-bromo-4-chloroindoxyl 2,3-di- <i>O</i> -benzoyl-4,6- <i>O</i> -di- <i>tert</i> -butylsilylene-D-galactopyranoside ( <b>19</b> ) | S-7     |
| 5-Bromo-4-chloroindoxyl 4,6- <i>O</i> -di- <i>tert</i> -butylsilylene-α-D-galactopyranoside ( <b>20</b> )                                          | S-8     |
| 5-Bromo-4-chloroindoxyl α-D-galactopyranoside ( <b>9</b> )                                                                                         | S-9     |

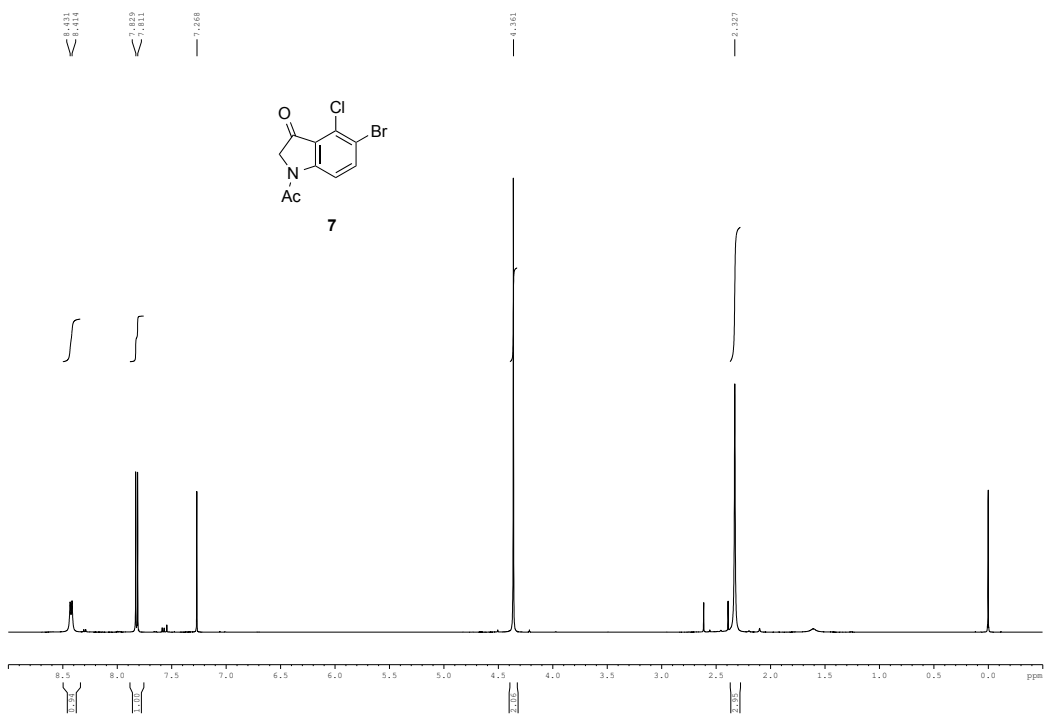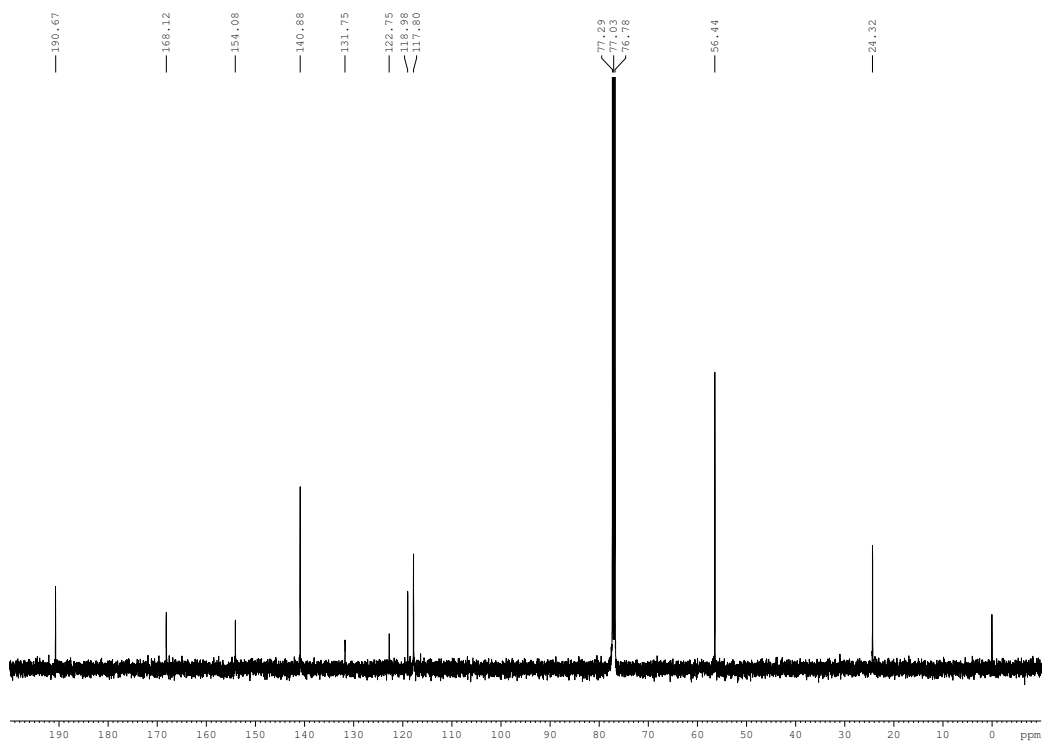









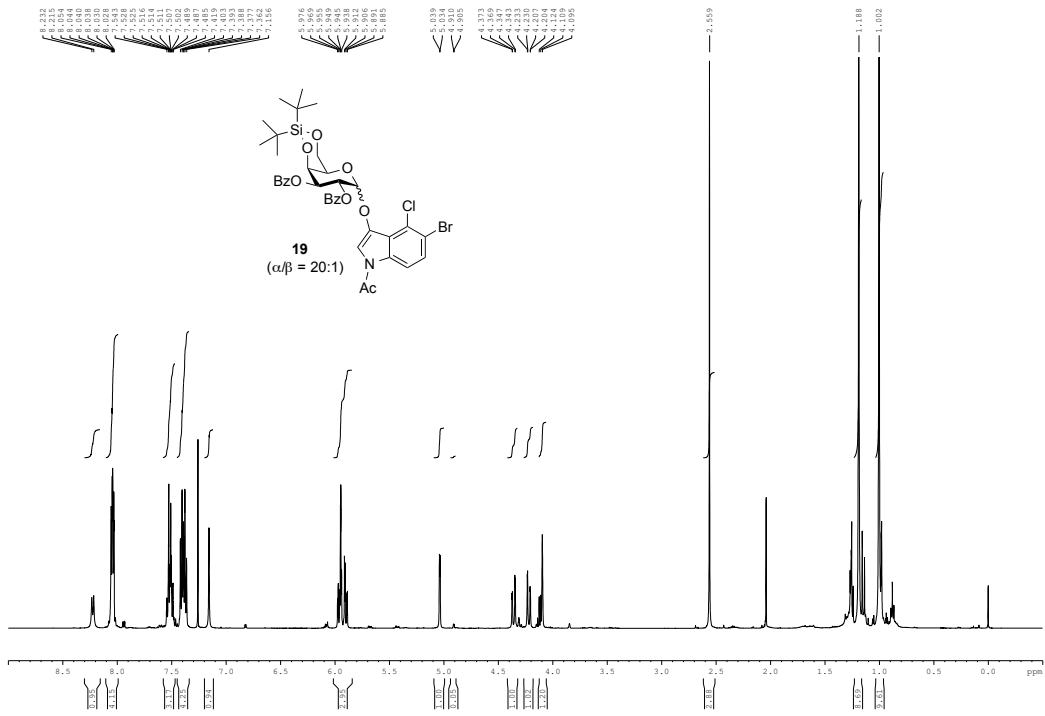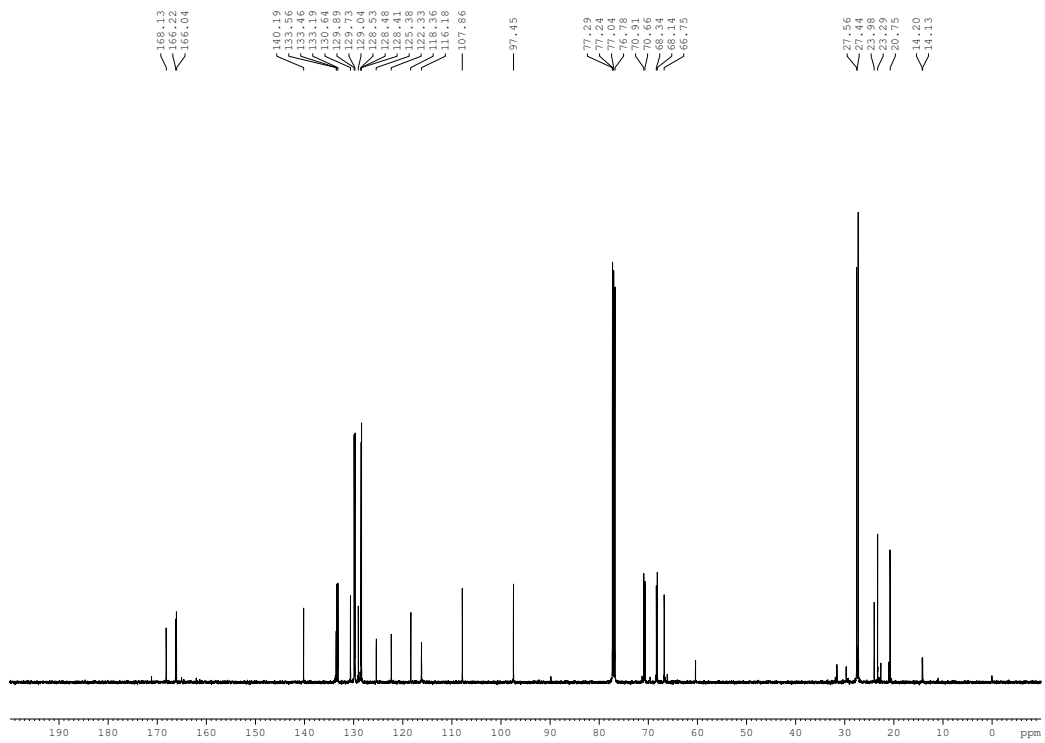





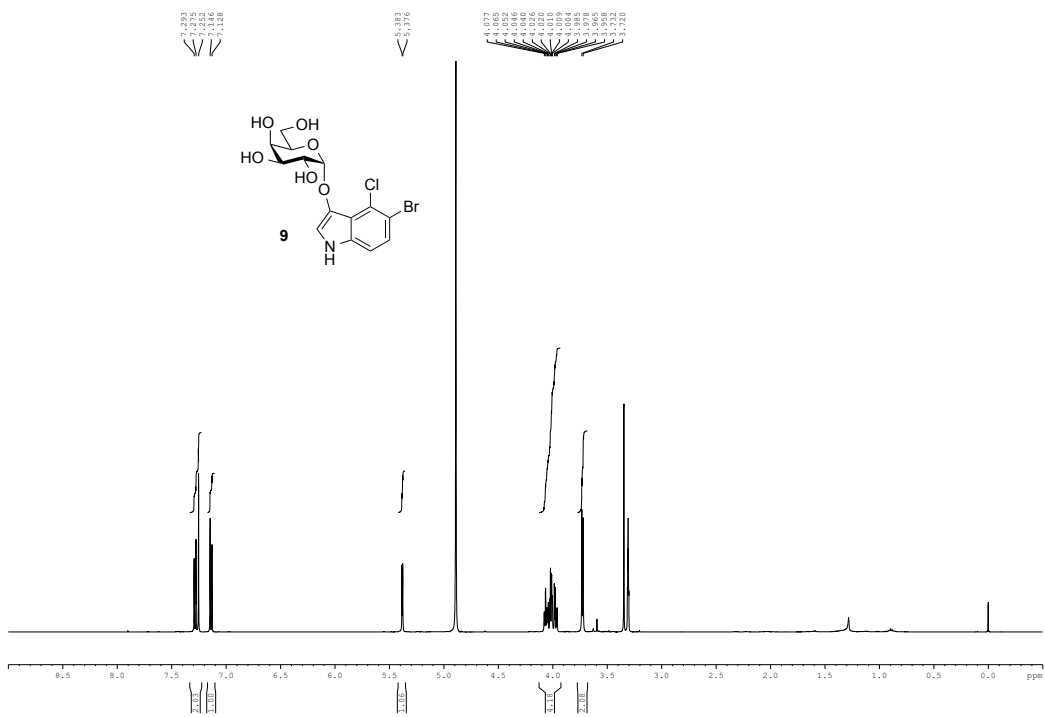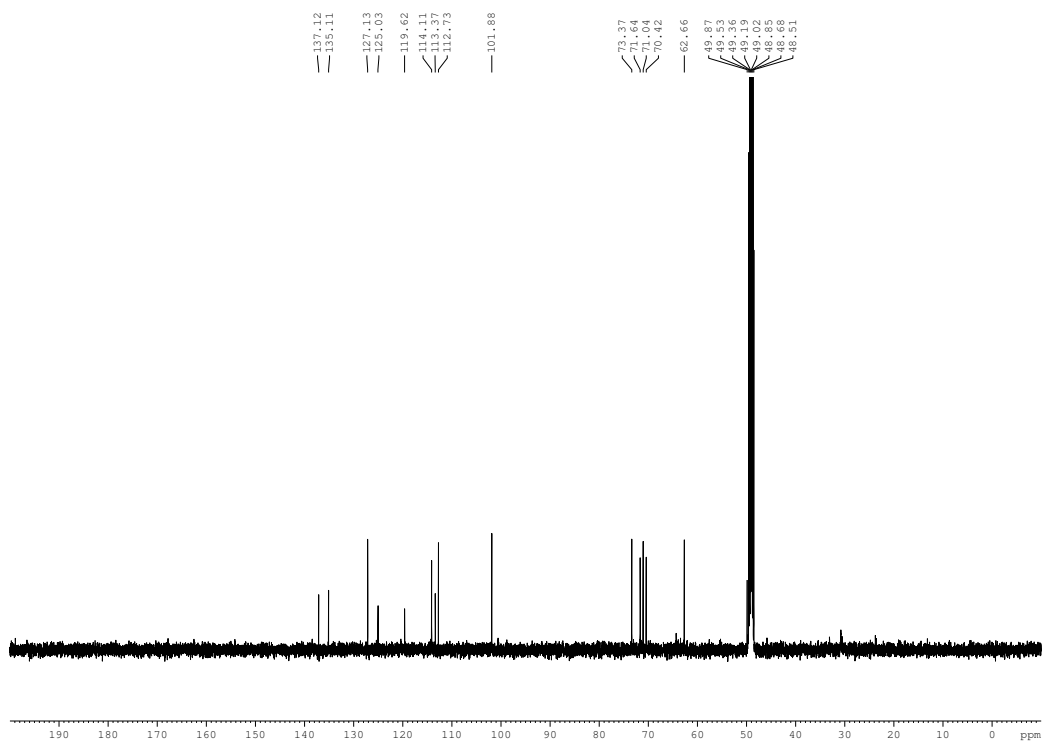

Supplement: c9ra05797h1.pdf [file c9ra05797h1.pdf]
